# Supplementary material for: A Retrospective Comparative Analysis of Outcomes and Prognostic Factors in Adult and Pediatric Patients with Osteosarcoma
Source: MDPI journal article supplement (doi:10.3390/curroncol28060443), 2021-12-12
Supplement: s1 [file s1]

**Table S1.** Stratified analysis of the relationship between OS and tumor necrosis in the adult cohort.

|                           | <b>≥90% Necrosis</b> |                          | <b>&lt;90% Necrosis</b>  |                |
|---------------------------|----------------------|--------------------------|--------------------------|----------------|
|                           | <b>N (%)</b>         | <b>5-year OS (95%CI)</b> | <b>5-year OS (95%CI)</b> | <b>p-Value</b> |
| <b>Age</b>                |                      |                          |                          |                |
| ≥32 years                 | 16/30 (53%)          | 100% (N/A)               | 69.3% (89.1%–31.2%)      | 0.297          |
| <32 years                 | 14/30 (47%)          | 66.7% (94.5%–5.4%)       | 44.4% (74.8%–10.3%)      | 0.299          |
| <b>Chemotherapy</b>       |                      |                          |                          |                |
| MAP                       | 17/30 (57%)          | 75.0% (96.0%–12.8%)      | 54.0% (80.0%–18.2%)      | 0.439          |
| AP                        | 13/30 (43%)          | 100% (N/A)               | 66.7% (87.9%–28.2%)      | 0.218          |
| <b>Primary metastases</b> |                      |                          |                          |                |
| Absent                    | 23/30 (77%)          | 100% (N/A)               | 60.5% (82.4%–27.1%)      | 0.148          |
| Detected                  | 7/30 (23%)           | 0.0% (0.0%–0.0%)         | 50.0% (84.5%–5.8%)       | 0.916          |
| <b>Site</b>               |                      |                          |                          |                |
| Axial                     | 6/30 (20%)           | 100% (N/A)               | 50.0% (91.0%–0.6%)       | 0.317          |
| Extremities               | 24/30 (80%)          | 83.3% (97.5%–27.3%)      | 58.7% (77.6%–28.8%)      | 0.312          |

95%CI, 95% Confidence Interval; AP, Doxorubicin-Cisplatin; MAP, Methotrexate-Doxorubicin-Cisplatin.

**Table S2.** Stratified analysis of the relationship between PFS and tumor necrosis in the adult cohort.

|                           |             | ≥90% Necrosis       | <90% Necrosis       |         |
|---------------------------|-------------|---------------------|---------------------|---------|
|                           | N (%)       | 5-year PFS (95%CI)  | 5-year PFS (95%CI)  | p-Value |
| <b>Age</b>                |             |                     |                     |         |
| ≥32 years                 | 14/30 (47%) | 25.0% (66.5%–0.9%)  | 50.0% (73.6%–20.9%) | 0.488   |
| <32 years                 | 16/30 (53%) | 75.0% (96.0%–12.8%) | 20.0% (47.4%–3.1%)  | 0.064   |
| <b>Chemotherapy</b>       |             |                     |                     |         |
| MAP                       | 17/30 (57%) | 50.0% (84.5%–5.8%)  | 23.1% (47.5%–5.6%)  | 0.289   |
| AP                        | 13/30 (43%) | 50.0% (84.5%–5.8%)  | 55.6% (80.5%–20.5%) | 0.970   |
| <b>Primary metastases</b> |             |                     |                     |         |
| Absent                    | 23/30 (77%) | 62.5% (89.3%–14.2%) | 41.2% (62.7%–18.6%) | 0.215   |
| Detected                  | 7/30 (23%)  | 25.0% (66.5%–0.9%)  | 20.0% (58.1%–0.8%)  | 0.688   |
| <b>Site</b>               |             |                     |                     |         |
| Axial                     | 6/30 (20%)  | 50.0% (91.0%–0.6%)  | 25.0% (66.5%–0.9%)  | 0.734   |
| Extremities               | 24/30 (80%) | 50.0% (80.4%–11.1%) | 38.9% (59.9%–17.5%) | 0.437   |

95%CI, 95% Confidence Interval; AP, Doxorubicin-Cisplatin; MAP, Methotrexate-Doxorubicin-Cisplatin.
